# Supplementary material
Source: publisher figshare collection journal article supplement (https://acs.figshare.com/articles/dataset/_/12749706)
Supplement: Supplementary file 1 [file 24125751]

## Supporting Information

**Mn<sub>3</sub>O<sub>4</sub> nanozyme coating accelerates nitrate reduction and decreases  
N<sub>2</sub>O emission during photoelectrotrophic denitrification by  
*Thiobacillus denitrificans*-CdS**

Xiangyu Chen, Qinyuan Feng, Quanhua Cai, Shaofu Huang, Yuqing Yu, Raymond  
Jianxiong Zeng, Man Chen\*, Shungui Zhou

Fujian Provincial Key Laboratory of Soil Environmental Health and Regulation,  
College of Resources and Environment, Fujian Agriculture and Forestry University,  
Fuzhou, Fujian 350002, China.

\*Corresponding author, Email: chenman@fafu.edu.cn

This supporting information contains 12-page document, including 9 figures, 2 tables  
and this cover page.

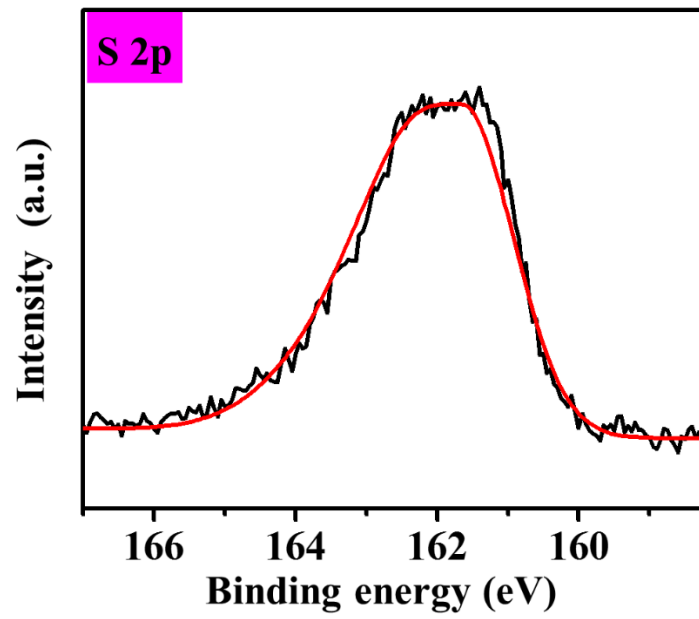

**Figure S1** XPS spectra of S 2p in *T. denitrificans*-CdS@Mn<sub>3</sub>O<sub>4</sub>.

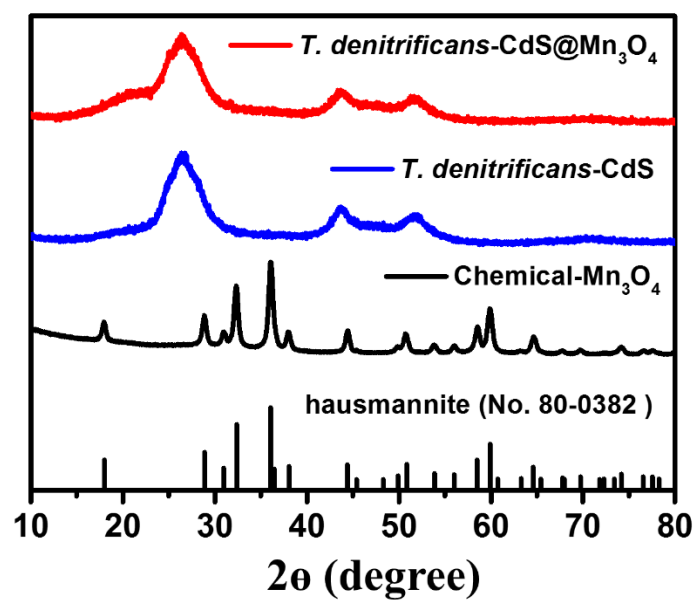

**Figure S2** XRD patterns of the *T. denitrificans*-CdS@Mn<sub>3</sub>O<sub>4</sub>, *T. denitrificans*-CdS and Chemical-Mn<sub>3</sub>O<sub>4</sub> (reference peak from JCPDS data card No. 80-0382).

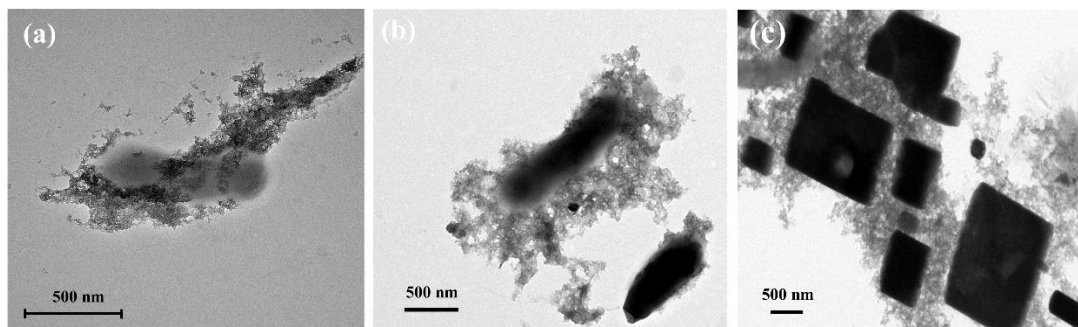

**Figure S3** TEM images of *T. denitrificans*-CdS@Mn<sub>3</sub>O<sub>4</sub>, *T. denitrificans*@Mn<sub>3</sub>O<sub>4</sub> and Chemical-Mn<sub>3</sub>O<sub>4</sub>.

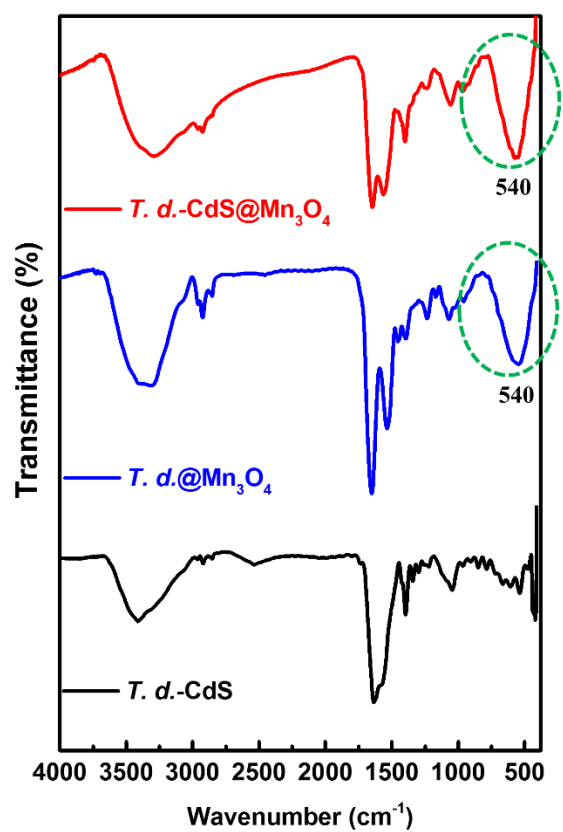

**Figure S4** FTIR spectra of *T. denitrificans*-CdS@Mn<sub>3</sub>O<sub>4</sub>, *T. denitrificans*@Mn<sub>3</sub>O<sub>4</sub> and *T. denitrificans*-CdS.

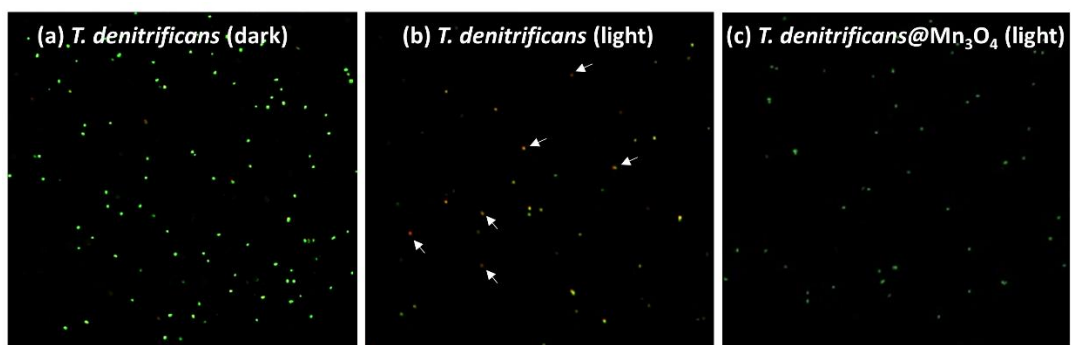

**Figure S5** LIVE/DEAD staining of *T. denitrificans* (dark) (a), *T. denitrificans* (light) (b), and *T. denitrificans*@Mn<sub>3</sub>O<sub>4</sub> (light) (c) after 72 hours of reaction.

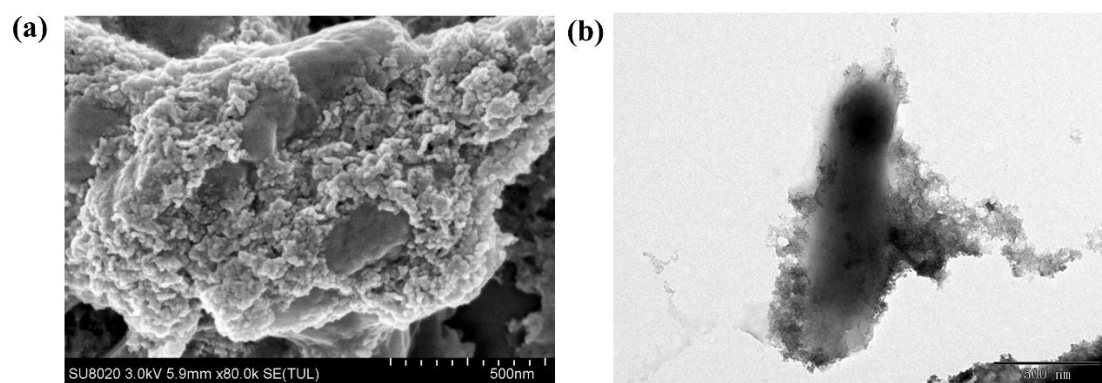

**Figure S6 (a)** SEM and **(b)** TEM images of *T.denitrificans*@Mn<sub>3</sub>O<sub>4</sub>.

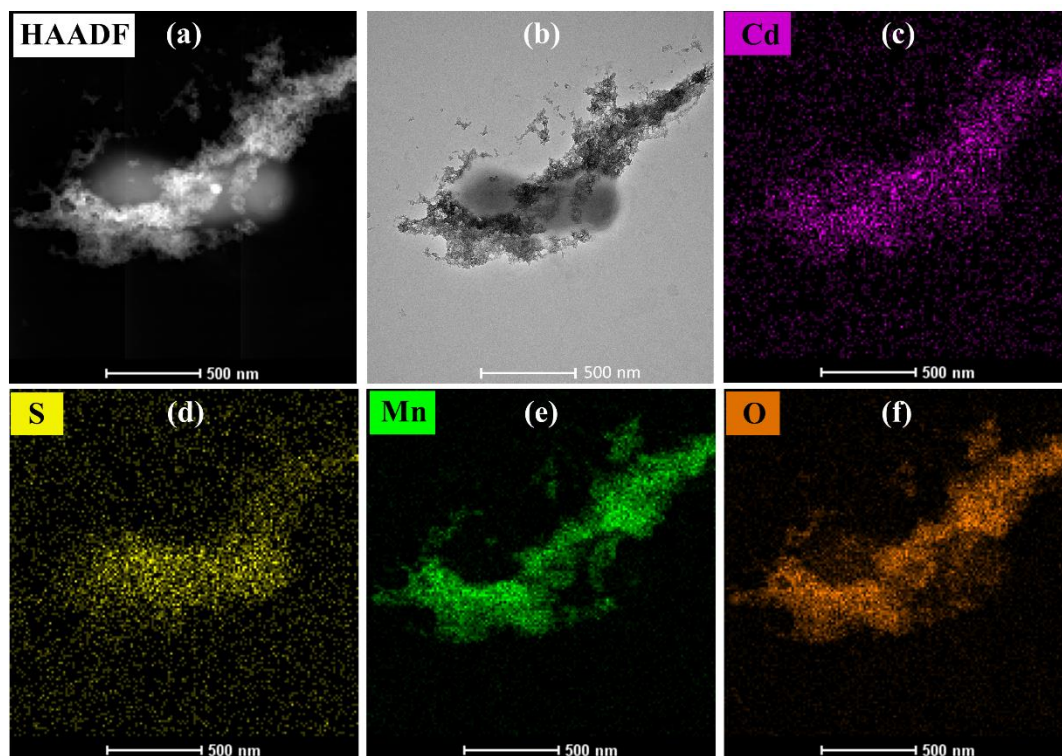

**Figure S7** (a) HAADF and (b) TEM image of *T. denitrificans*-CdS@Mn<sub>3</sub>O<sub>4</sub>; (c-f) EDS mapping of elements Cd, S, Mn and O.



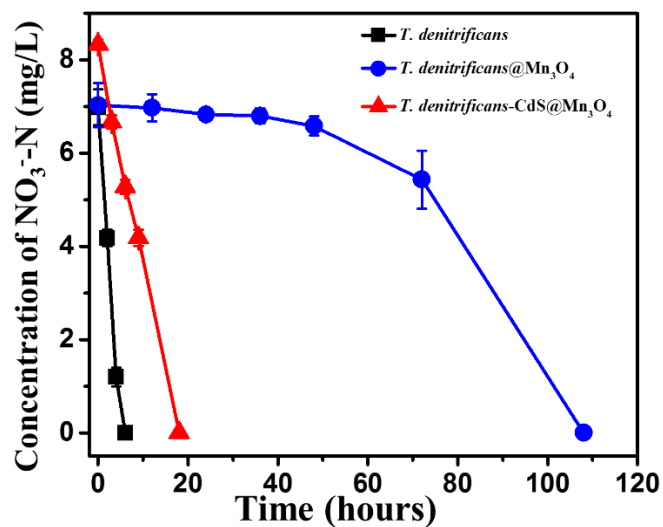

**Figure S8** Time curves of NO<sub>3</sub>-N reduction during denitrification by *T. denitrificans* and *T. denitrificans*@Mn<sub>3</sub>O<sub>4</sub> using sodium thiosulfate as the electron donor. For *T. denitrificans*-CdS@Mn<sub>3</sub>O<sub>4</sub>, photoelectron was used as the electron donor.

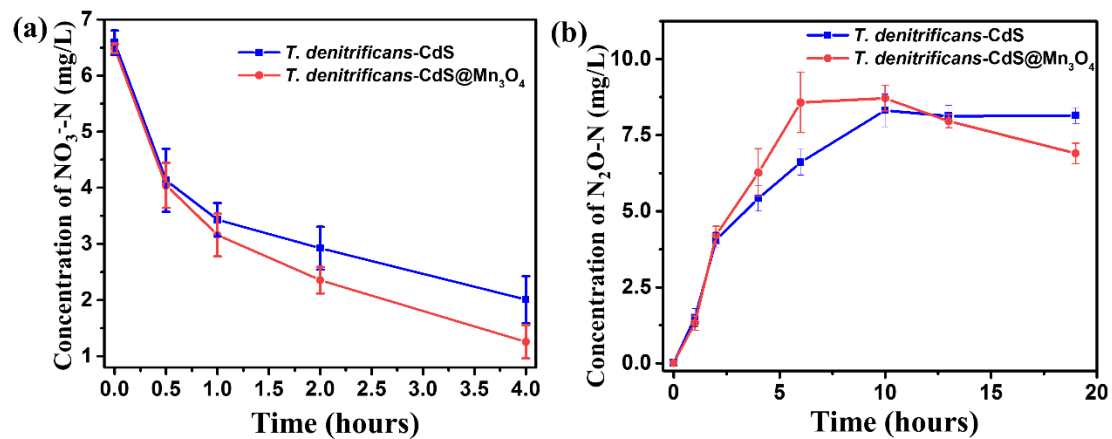

**Figure S9** (a) Time curves of NO<sub>3</sub><sup>-</sup>-N reduction during PEDeN by *T. denitrificans*-CdS and *T. denitrificans*-CdS@Mn<sub>3</sub>O<sub>4</sub>. (b) Time curves of N<sub>2</sub>O-N generation during PEDeN by *T. denitrificans*-CdS and *T. denitrificans*-CdS@Mn<sub>3</sub>O<sub>4</sub>.

**Table S1** Analysis of the concentrations of Cd and Mn in *T. denitrificans*-CdS@Mn<sub>3</sub>O<sub>4</sub>.

| <b>Element</b> | <b>Concentration (mg/L)</b> |
|----------------|-----------------------------|
| Mn             | 451 ± 10                    |
| Cd             | 78 ± 5                      |

**Table S2** BET surface area of *T. denitrificans*-CdS and *T. denitrificans*-CdS@Mn<sub>3</sub>O<sub>4</sub>

| <b>Sample</b>                                               | <b>BET surface area (m<sup>2</sup> g<sup>-1</sup>)</b> |
|-------------------------------------------------------------|--------------------------------------------------------|
| <i>T. denitrificans</i> -CdS                                | 11.6 ± 0.1                                             |
| <i>T. denitrificans</i> -CdS@Mn <sub>3</sub> O <sub>4</sub> | 11.3 ± 0.2                                             |
